# Supplementary material
Source: HighWire-hosted journal article supplement (https://erj.ersjournals.com/content/59/1/2004345)
Supplement: inline-supplementary-material-1 [file inline-supplementary-material-1.pdf]

## SUPPLEMENTARY DATA SECTION

**Supplementary table S1. Association of 6-month culture conversion with injectable use at baseline**

| Primary exposure - outcome    | n/N     | Unadjusted analysis                |                                          |         | Adjusted analyses                                                              |         |                                                                                     |         |
|-------------------------------|---------|------------------------------------|------------------------------------------|---------|--------------------------------------------------------------------------------|---------|-------------------------------------------------------------------------------------|---------|
|                               |         | Percent culture converted (95% CI) | Crude OR (95% CI) <sup>a</sup><br>N=1125 | p value | Model 1<br><i>complete case:</i><br>adjusted OR (95% CI) <sup>b</sup><br>N=938 | p value | Model 2<br><i>missing indicator:</i><br>adjusted OR (95% CI) <sup>c</sup><br>N=1110 | p value |
| All-oral regimen              | 526/625 | 83.8 (71.9 – 91.3)                 | Reference                                | 0.24    | Reference                                                                      | 0.40    | Reference                                                                           | 0.31    |
| Injectable-containing regimen | 425/497 | 85.5 (81.0 – 89.1)                 | 1.25 (0.87 – 1.81)                       |         | 0.80 (0.48 – 1.34)                                                             |         | 0.80(0.51– 1.24)                                                                    |         |

OR odds ratio; CI confidence interval

<sup>a</sup> adjusted for clustering by site

<sup>b</sup> adjusted for clustering by country and *a priori* covariates (age, sex, year of enrolment, previous history of TB treatment, HIV status, baseline resistance profile, BMI<18.5, presence of extensive disease at baseline (cavitation and at least 3+ smear grade), inclusion of Group A drugs in the baseline regimen as binary variables (e.g. linezolid 0/1; bedaquiline 0/1 etc.), delamanid, at least 5 effective drugs in the baseline regimen, anaemia, hepatitis C seropositivity (complete case analysis: N=938)

<sup>c</sup> adjusted for clustering by country and *a priori* covariates (age, sex, year of enrolment, previous history of TB treatment, HIV status, baseline resistance profile, BMI<18.5, presence of extensive disease at baseline (cavitation and at least 3+ smear grade), inclusion of Group A drugs in the baseline regimen as binary variables (e.g. linezolid 0/1; bedaquiline 0/1 etc.), delamanid, at least 5 effective drugs in the baseline regimen, anaemia, hepatitis C seropositivity (including missing indicator variables: N=1110; \*model dropped missing indicator for low BMI (n=10) as predicted outcome perfectly)

**Supplementary table S2. Association by injectable agent in baseline injectable containing regimens with 6-month culture conversion compared to all-oral regimen**

| By injectable agent at baseline | n/N     | Unadjusted analysis                |                                          |         | Adjusted analyses                                                              |         |                                                                                     |         |
|---------------------------------|---------|------------------------------------|------------------------------------------|---------|--------------------------------------------------------------------------------|---------|-------------------------------------------------------------------------------------|---------|
|                                 |         | Percent culture converted (95% CI) | Crude OR (95% CI) <sup>a</sup><br>N=1125 | p value | Model 1<br><i>Complete case:</i><br>adjusted OR (95% CI) <sup>b</sup><br>N=938 | p value | Model 2<br><i>Missing indicator:</i><br>adjusted OR (95% CI) <sup>c</sup><br>N=1110 | p value |
| No SLI                          | 522/623 | 83.8 (71.9 – 91.2)                 | Reference                                | 0.12    | Reference                                                                      | 0.44    | Reference                                                                           | 0.24    |
| Amikacin                        | 118/138 | 85.5 (81.1 – 89.0)                 | 1.05(0.58 – 1.92)                        |         | 0.72 (0.33 – 1.58)                                                             |         | 0.65 (0.33 – 1.27)                                                                  |         |
| Kanamycin                       | 62/69   | 89.9 (80.8 – 94.9)                 | 2.68 (1.12 – 6.43)                       |         | 1.62 (0.51 – 5.21)                                                             |         | 1.54 (0.59 – 4.00)                                                                  |         |
| Capreomycin                     | 245/290 | 84.5 (76.1 – 90.3)                 | 1.11 (0.72 – 1.71)                       |         | 0.74 (0.42 – 1.33)                                                             |         | 0.72 (0.43 – 1.20)                                                                  |         |

OR odds ratio; CI confidence interval

<sup>a</sup>adjusted for clustering by site

<sup>b</sup>adjusted for clustering by country and *a priori* covariates (age, sex, year of enrolment, previous history of TB treatment, HIV status, baseline resistance profile, BMI<18.5, presence of extensive disease at baseline (cavitation and at least 3+ smear grade), inclusion of Group A drugs in the baseline regimen as binary variables (e.g. linezolid 0/1; bedaquiline 0/1 etc.), delamanid, at least 5 effective drugs in the baseline regimen, anaemia, hepatitis C seropositivity (complete case analysis: N=941)

<sup>c</sup>Mixed effects logistic regression model adjusted for clustering by country and *a priori* covariates (age, sex, year of enrolment, previous history of TB treatment, HIV status, baseline resistance profile, BMI<18.5, presence of extensive disease at baseline (cavitation and at least 3+ smear grade), inclusion of Group A drugs in the baseline regimen as binary variables (e.g. linezolid 0/1; bedaquiline 0/1 etc.), delamanid, at least 5 effective drugs in the baseline regimen, anaemia, hepatitis C seropositivity (including missing indicator variables: N=1115; \*model dropped missing indicator for low BMI (n=10) as predicted outcome perfectly)

**Supplementary table S3. Assessing for effect modification of the association of injectable use at baseline and 6-month culture conversion by baseline resistance to any injectable (N=1064\*)**

| Effect modification by<br>baseline resistance to any<br>injectable | Unadjusted analysis |                                          |                                          |                                         | Adjusted analyses                                           |                                             |                                                                               |                                             |
|--------------------------------------------------------------------|---------------------|------------------------------------------|------------------------------------------|-----------------------------------------|-------------------------------------------------------------|---------------------------------------------|-------------------------------------------------------------------------------|---------------------------------------------|
|                                                                    | n/N                 | Percent culture<br>converted<br>(95% CI) | Crude OR (95% CI) <sup>a</sup><br>N=1069 | p value                                 | Model 1                                                     | p value                                     | Model 2                                                                       | p value                                     |
|                                                                    |                     |                                          |                                          |                                         | <i>Complete case:</i><br>aOR (95% CI) <sup>b</sup><br>N=902 |                                             | <i>Missing indicator:</i><br>aOR (95% CI) <sup>c</sup><br>N=1050 <sup>^</sup> |                                             |
| No baseline resistance to any injectable (N=562)                   |                     |                                          |                                          |                                         |                                                             |                                             |                                                                               |                                             |
| All-oral regimen                                                   | 221/257             | 86.0 (64.3 - 95.4)                       | Reference                                |                                         | Reference                                                   |                                             | Reference                                                                     |                                             |
| Injectable-containing<br>regimen                                   | 262/305             | 85.9 (83.2 - 88.3)                       | 1.27 (0.73 – 2.24)                       | LRT for effect<br>modification:<br>0.61 | 0.69 (0.31 – 1.53)                                          | LRT for<br>effect<br>modification<br>: 0.69 | 0.64 (0.32 – 1.27)                                                            | LRT for<br>effect<br>modification<br>: 0.56 |
| Evidence of baseline resistance to an injectable (N=502)           |                     |                                          |                                          |                                         |                                                             |                                             |                                                                               |                                             |
| All-oral regimen                                                   | 269/321             | 82.5 (73.4 - 89.0)                       | Reference                                |                                         | Reference                                                   |                                             | Reference                                                                     |                                             |
| Injectable-containing<br>regimen                                   | 153/181             | 84.5 (72.7 - 91.8)                       | 1.05 (0.62 – 1.77)                       |                                         | 0.85 (0.44 – 1.65)                                          |                                             | 0.83 (0.46 – 1.49)                                                            |                                             |

OR odds ratio; CI confidence interval \*N=56 were missing data on baseline resistance to injectable agent and were excluded from this analysis

<sup>a</sup>adjusted for clustering by site

<sup>b</sup>adjusted for clustering by country and *a priori* covariates (age, sex, year of enrolment, previous history of TB treatment, baseline resistance profile, HIV status, BMI<18.5, presence of extensive disease at baseline (cavitation and at least 3+ smear grade), inclusion of Group A drugs in the baseline regimen as binary variables (e.g. linezolid 0/1; bedaquiline 0/1; fluoroquinolone 0/1, delamanid 0/1), at least 5 effective drugs in the baseline regimen, anaemia, hepatitis C seropositivity (complete case analysis)

<sup>c</sup>Mixed effects logistic regression model adjusted for clustering by country and *a priori* covariates (age, sex, year of enrolment, previous history of TB treatment, baseline resistance profile, HIV status, BMI<18.5, presence of extensive disease at baseline (cavitation and at least 3+ smear grade), inclusion of Group A drugs in the baseline regimen as binary variables (e.g. linezolid 0/1; bedaquiline 0/1; fluoroquinolone 0/1, delamanid 0/1), at least 5 effective drugs in the baseline regimen, anaemia, hepatitis C seropositivity (including missing indicator variables: N=1050<sup>^</sup>; model dropped missing indicator for low BMI (n=9) as predicted outcome perfectly and dropped missing indicator for hepatitis C seropositivity (n=5))

**Supplementary table S4: Assessing for effect modification of the association of injectable use and 6-month culture conversion by HIV status (N=1104\*)**

|                                   |         | Unadjusted analysis                |                                          |                   | Adjusted analyses                                                      |                   |                                                                             |                   |                                                                                        |                   |
|-----------------------------------|---------|------------------------------------|------------------------------------------|-------------------|------------------------------------------------------------------------|-------------------|-----------------------------------------------------------------------------|-------------------|----------------------------------------------------------------------------------------|-------------------|
| Effect modification by HIV status | n/N     | Percent culture converted (95% CI) | Crude OR (95% CI) <sup>a</sup><br>N=1104 | p value           | Model 1<br><i>Complete case:</i><br>aOR (95% CI) <sup>b</sup><br>N=938 |                   | Model 2<br><i>Missing indicator:</i><br>aOR (95% CI) <sup>c</sup><br>N=1094 |                   | Model 3<br><i>Deaths &amp; losses excluded:</i><br>aOR (95% CI) <sup>d</sup><br>N=1025 |                   |
|                                   |         |                                    |                                          |                   | p value                                                                | p value           | p value                                                                     | p value           |                                                                                        |                   |
| <b>HIV negative (N=986)</b>       |         |                                    |                                          |                   |                                                                        |                   |                                                                             |                   |                                                                                        |                   |
| All-oral regimen                  | 463/534 | 86.7 (76.3 – 93.0)                 | Reference                                | 0.39 <sup>^</sup> | Reference                                                              | 0.23 <sup>^</sup> | Reference                                                                   | 0.17 <sup>^</sup> | Reference                                                                              | 0.18 <sup>^</sup> |
| Injectable-containing regimen     | 390/452 | 86.3 (81.7 – 89.9)                 | 1.17 (0.79 – 1.74)                       |                   | 0.74 (0.43 – 1.25)                                                     |                   | 0.68 (0.43 – 1.09)                                                          |                   | 0.50 (0.28 – 0.91)                                                                     |                   |
| <b>HIV positive (N=118)</b>       |         |                                    |                                          |                   |                                                                        |                   |                                                                             |                   |                                                                                        |                   |
| All-oral regimen                  | 58/88   | 65.9 (58.1 – 72.9)                 | Reference                                |                   | Reference                                                              |                   | Reference                                                                   |                   | Reference                                                                              |                   |
| Injectable-containing regimen     | 24/30   | 80.0 (69.2 – 87.7)                 | 1.92 (0.65 – 5.63)                       |                   | 1.88 (0.41– 8.64)                                                      |                   | 1.63 (0.47 – 5.62)                                                          |                   | 1.66 (0.30 – 9.27)                                                                     |                   |

OR odds ratio; CI confidence interval \*N=16 were missing data on baseline HIV status

<sup>a</sup> adjusted for clustering by country

<sup>b</sup> adjusted for clustering by country and *a priori* covariates (age, sex, year of enrolment, previous history of TB treatment, baseline resistance profile, BMI<18.5, presence of extensive disease at baseline (cavitation and at least 3+ smear grade), inclusion of Group A drugs in the baseline regimen as binary variables (e.g. linezolid 0/1; bedaquiline 0/1 etc.), delamanid, baseline resistance to any injectable agent, at least 5 effective drugs in the baseline regimen, anaemia, hepatitis C seropositivity (complete case analysis: N=905)

<sup>c</sup> Mixed effects logistic regression model adjusted for clustering by country and *a priori* covariates (age, sex, year of enrolment, previous history of TB treatment, baseline resistance profile, BMI<18.5, presence of extensive disease at baseline (cavitation and at least 3+ smear grade), inclusion of Group A drugs in the baseline regimen as binary variables (e.g. linezolid 0/1; bedaquiline 0/1 etc.), delamanid, baseline resistance to any injectable agent, at least 5 effective drugs in the baseline regimen, anaemia, hepatitis C seropositivity (including missing indicator variables: N=1099; model dropped missing indicator for low BMI (n=10) as predicted outcome perfectly)

<sup>d</sup> Mixed effects logistic regression model adjusted for clustering by country and *a priori* covariates (age, sex, year of enrolment, previous history of TB treatment, baseline resistance profile, BMI<18.5, presence of extensive disease at baseline (cavitation and at least 3+ smear grade), inclusion of Group A drugs in the baseline regimen as binary variables (e.g. linezolid 0/1; bedaquiline 0/1 etc.), delamanid, baseline resistance to any injectable agent, at least 5 effective drugs in the baseline regimen, anaemia, hepatitis C seropositivity (including missing indicator variables having dropped N=69 deaths and losses: N=1025; model dropped missing indicator for low BMI (n=10) as predicted outcome perfectly)

<sup>^</sup> Likelihood ratio test for effect modification

**Supplementary table S5.** Characteristics of patients initiating a bedaquiline and/or delamanid-containing regimen with a baseline culture and known HIV status, from April 1, 2015 – March 31, 2017 (N=1104)

| CHARACTERISTIC                             | STRATIFIED BY HIV STATUS AND INJECTABLE USE AT BASELINE |                                      |                          |                                       |
|--------------------------------------------|---------------------------------------------------------|--------------------------------------|--------------------------|---------------------------------------|
|                                            | HIV positive (N=118)                                    |                                      | HIV negative (N=986)     |                                       |
|                                            | All-oral regimen (N=88)                                 | Injectable-containing regimen (N=30) | All-oral regimen (N=534) | Injectable-containing regimen (N=452) |
|                                            | n (%) <sup>a</sup>                                      | n (%) <sup>a</sup>                   | n (%) <sup>a</sup>       | n (%) <sup>a</sup>                    |
| <b>Demographic</b>                         |                                                         |                                      |                          |                                       |
| Median age at treatment initiation (range) | 39 (24 - 76)                                            | 39.5 (26 – 53)                       | 36 (15 - 69)             | 34 (15 - 67)                          |
| Female                                     | 23 (25.8)                                               | 8 (26.7)                             | 178 (33.1)               | 156 (34.5)                            |
| Country                                    |                                                         |                                      |                          |                                       |
| Armenia                                    | 4 (5.5)                                                 | 3 (11.1)                             | 32 (6.0)                 | 35 (7.7)                              |
| Bangladesh                                 | 0 (0)                                                   | 0 (0)                                | 143 (26.6)               | 16 (3.5)                              |
| Belarus                                    | 5 (5.6)                                                 | 3 (10.0)                             | 29 (5.4)                 | 16 (3.5)                              |
| Ethiopia                                   | 1 (1.1)                                                 | 7 (23.3)                             | 2 (0.4)                  | 6 (1.3)                               |
| Georgia                                    | 5 (5.6)                                                 | 8 (26.7)                             | 62 (11.6)                | 105 (23.2)                            |
| Haiti                                      | 1 (1.1)                                                 | 0 (0)                                | 1 (0.2)                  | 0 (0)                                 |
| Indonesia                                  | 0 (0)                                                   | 0 (0)                                | 17 (3.2)                 | 3 (0.7)                               |
| Kazakhstan                                 | 1 (1.1)                                                 | 0 (0)                                | 136 (25.5)               | 83 (18.4)                             |
| Kenya                                      | 0 (0)                                                   | 0 (0)                                | 1 (0.2)                  | 2 (0.4)                               |
| Kyrgyzstan                                 | 0 (0)                                                   | 0 (0)                                | 4 (0.8)                  | 4 (0.9)                               |
| Lesotho                                    | 56 (62.9)                                               | 7 (23.3)                             | 15 (2.8)                 | 5 (1.1)                               |
| Myanmar                                    | 3 (3.7)                                                 | 0 (0)                                | 10 (1.9)                 | 1 (0.2)                               |
| North Korea                                | 0 (0)                                                   | 0 (0)                                | 0 (0)                    | 0 (0)                                 |
| Pakistan                                   | 1 (1.1)                                                 | 0 (0)                                | 55 (10.2)                | 108 (23.9)                            |
| Peru                                       | 2 (3.4)                                                 | 2 (6.7)                              | 24 (4.5)                 | 64 (14.2)                             |
| South Africa                               | 9 (10.1)                                                | 0 (0)                                | 3 (0.6)                  | 0 (0)                                 |
| Vietnam                                    | 0 (0)                                                   | 0 (0)                                | 0 (0)                    | 4 (0.4)                               |

|                                                                        |           |           |            |            |
|------------------------------------------------------------------------|-----------|-----------|------------|------------|
| Calendar year of study recruitment                                     |           |           |            |            |
| 2015                                                                   | 3 (3.4)   | 4 (13.3)  | 41 (7.6)   | 47 (10.4)  |
| 2016                                                                   | 18 (20.2) | 16 (53.3) | 149 (27.7) | 209 (46.2) |
| 2017                                                                   | 51(58.4)  | 7 (23.3)  | 242 (45.0) | 149 (33.0) |
| 2018                                                                   | 16 (18.0) | 3 (10.0)  | 106 (19.7) | 47 (10.4)  |
| <b>Comorbidities</b>                                                   |           |           |            |            |
| Diabetes mellitus (HIV+ N=86; HIV- N=970) <sup>a</sup>                 | 5 (8.6)   | 0 (0)     | 86 (16.6)  | 47 (10.5)  |
| Hepatitis B serology positive (HIV+ N=116; HIV- N=982)                 | 9 (10.3)  | 3 (10.0)  | 28 (5.2)   | 6 (1.3)    |
| Hepatitis C serology positive (HIV+ N=115; HIV- N=983)                 | 14 (16.3) | 14 (46.7) | 67 (12.5)  | 49 (10.8)  |
| At least one other co-morbidity <sup>b</sup>                           | 12 (13.5) | 7 (23.3)  | 61 (11.3)  | 35 (7.7)   |
| <b>Tuberculosis-related</b>                                            |           |           |            |            |
| <b>Prior tuberculosis treatment</b>                                    |           |           |            |            |
| No prior treatment                                                     | 25 (28.1) | 7 (23.3)  | 29 (6.8)   | 47 (11.6)  |
| Prior treatment only with first line drugs                             | 27 (30.3) | 2 (6.7)   | 68 (15.9)  | 26 (6.4)   |
| Prior treatment with second line drugs                                 | 36 (40.9) | 21 (70.0) | 332 (77.4) | 332 (82.0) |
| <b>Cavitary disease and smear status (N=977) <sup>c</sup></b>          | 37 (43.5) | 12 (56.7) | 352 (66.7) | 317 (71.6) |
| No cavitary disease, smear status <3+                                  | 25 (40.3) | 8 (40.0)  | 134 (27.7) | 124 (30.2) |
| Cavitary disease, smear status <3+                                     | 25 (40.3) | 7 (35.0)  | 260 (53.6) | 227 (55.2) |
| No cavitary disease, smear status 3+                                   | 6 (9.7)   | 2 (10.0)  | 16 (3.3)   | 16 (3.9)   |
| Cavitary disease, smear status 3+                                      | 6 (9.7)   | 3 (15.0)  | 74(15.4)   | 44 (10.7)  |
| <b>Baseline resistance profile <sup>d</sup></b>                        |           |           |            |            |
| MDR/RR-TB without injectable or fluoroquinolone resistance             | 34 (38.2) | 3 (10.0)  | 126 (23.6) | 60 (13.3)  |
| MDR/RR-TB without testing for injectable or fluoroquinolone resistance | 19 (21.4) | 2 (6.7)   | 25 (4.7)   | 4 (0.9)    |
| MDR/RR-TB with any injectable resistance                               | 9 (10.1)  | 2 (6.7)   | 63 (11.8)  | 29 (6.4)   |
| MDR/RR-TB with any fluoroquinolone resistance                          | 7 (7.9)   | 13 (43.3) | 87 (16.2)  | 221 (48.9) |
| XDR-TB                                                                 | 19 (21.6) | 9 (30.0)  | 223 (41.8) | 134 (29.7) |
| No result for MDR/RR-TB                                                | 0 (0)     | 1 (3.3)   | 10 (1.9)   | 4 (0.9)    |
| <b>Anaemia (haemoglobin&lt;10.0 g/dL) (HIV+ N=108; HIV- N=951)</b>     | 29 (35.4) | 6 (23.1)  | 62 (12.1)  | 38 (8.7)   |
| <b>Body mass index &lt;18.5 (HIV+ N=115; HIV- N=979)</b>               | 43 (50.0) | 12 (41.4) | 242 (45.6) | 185 (41.3) |
| <b>Baseline regimen characteristics</b>                                |           |           |            |            |

|                                                                                                                |                 |                 |              |              |
|----------------------------------------------------------------------------------------------------------------|-----------------|-----------------|--------------|--------------|
| Drugs comprising the baseline regimen                                                                          |                 |                 |              |              |
| Bedaquiline                                                                                                    | 31 (35.2)       | 18 (60.0)       | 389 (72.9)   | 363 (80.3)   |
| Delamanid                                                                                                      | 61 (69.3)       | 13 (43.3)       | 238 (44.6)   | 101 (22.4)   |
| Bedaquiline and delamanid                                                                                      | 4 (4.5)         | 1 (3.3)         | 93 (17.3)    | 12 (2.7)     |
| Moxifloxacin or levofloxacin                                                                                   | 65 (73.0)       | 11 (36.7)       | 327 (61.0)   | 242 (53.5)   |
| Linezolid                                                                                                      | 39 (44.3)       | 27 (90.0)       | 439 (82.3)   | 401 (88.7)   |
| Clofazimine                                                                                                    | 48 (55.1)       | 25 (83.3)       | 409 (76.8)   | 317 (70.1)   |
| Cycloserine                                                                                                    | 62 (69.7)       | 20 (66.7)       | 329 (61.9)   | 320 (70.8)   |
| Imipenem/cilastatin or meropenem/cilastatin                                                                    | 11 (12.4)       | 5 (16.7)        | 177 (32.9)   | 47 (10.4)    |
| Prothionamide or ethionamide                                                                                   | 43 (48.3)       | 12 (40.0)       | 109 (20.3)   | 149 (33.0)   |
| Median number of drugs included in baseline regimen (interquartile range)                                      | 6 (5 - 6)       | 6 (6 - 7)       | 6 (5 - 6)    | 6 (6 - 7)    |
| Median number of likely effective drugs included in baseline regimen (interquartile range; range) <sup>e</sup> | 5 (4 - 6)       | 5 (4 - 6)       | 4 (4 - 5)    | 5 (4 - 5)    |
| At least 5 effective drugs included in the baseline regimen                                                    | 60 (68.2)       | 20 (66.7)       | 237 (44.4)   | 249 (55.1)   |
| <b>HIV-related</b>                                                                                             |                 |                 |              |              |
| Baseline CD4 count (cell / mm <sup>3</sup> )                                                                   | 195 (60 - 308)  | 221 (86 - 411)  |              |              |
| On ART at baseline (N=113: no injectable-84, on injectable-29)                                                 | 70 (83.3)       | 23 (79.3)       | -            | -            |
| Time on ART (years) median (IQR) (N=92: no injectable-70, on injectable-22)                                    | 1.7 (0.2 - 6.5) | 1.7 (0.5 - 4.0) | -            | -            |
| Lost to follow-up                                                                                              | 4/88 (4.6)      | 1/30 (3.3)      | 14/534 (2.6) | 8/452 (1.8)  |
| Died                                                                                                           | 12/88 (13.6)    | 2/30 (6.7)      | 15/534 (2.8) | 11/452 (2.4) |

RR/ MDR-TB rifampicin resistance / multidrug resistant tuberculosis; XDR-TB extensively drug-resistant TB

<sup>a</sup> Diabetes determined based on laboratory results (i.e., random blood sugar > 200 mg/dL or 11.1 (mmol/L); fasting blood sugar ≥ 126 mg/dL and a HbA1c result ≥ 6.5%; or two HbA1c results ≥ 6.5%) or clinician report

<sup>b</sup> Co-morbidity other than HIV, hepatitis B, hepatitis C and diabetes mellitus

<sup>c</sup> Clinical phenotype of extensive disease defined by a baseline sputum smear grade ≥3+ and presence of cavitation on chest radiography

<sup>d</sup> Resistance profile categories are mutually exclusive

<sup>e</sup> A drug was considered likely effective if all reported testing to that drug confirmed susceptibility or no resistance to the drug was reported and the patient had not previously received the drug for one month or more. Otherwise the drug was not considered likely effective.
