# Supplementary material
Source: HighWire-hosted journal article supplement (https://erj.ersjournals.com/content/59/1/2004345)
Supplement: inline-supplementary-material-2 [file inline-supplementary-material-2.pdf]

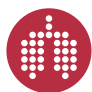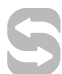

SHAREABLE PDF

# All-oral longer regimens are effective for the management of multidrug-resistant tuberculosis in high-burden settings

Palwasha Y. Khan <sup>1,2,23</sup>, Molly F. Franke<sup>3,4,23</sup>, Catherine Hewison<sup>5</sup>, Kwonjune J. Seung<sup>3,6</sup>, Helena Huerga <sup>7</sup>, Sidney Atwood<sup>6</sup>, Saman Ahmed<sup>8</sup>, Munira Khan<sup>9</sup>, Tanha Sultana<sup>10</sup>, Mohammad Manzur-ul-Alam<sup>10</sup>, Luan N.Q. Vo <sup>1,11</sup>, Leonid Lecca<sup>12</sup>, Kalkidan Yae<sup>13</sup>, Serik Kozhabekov<sup>14</sup>, Meseret Tamirat<sup>15</sup>, Alain Gelin<sup>16</sup>, Stalz C. Vilbrun<sup>17</sup>, Marina Kikvidze<sup>18</sup>, Jamil Faqirzai<sup>19</sup>, Abdullaat Kadyrov<sup>20</sup>, Alena Skrahina<sup>21</sup>, Anita Mesic<sup>22</sup>, Nana Avagyan<sup>5</sup>, Mathieu Bastard<sup>7</sup>, Michael L. Rich<sup>3,6</sup>, Uzma Khan <sup>1,24</sup> and Carole D. Mitnick <sup>3,4,24</sup>

<sup>1</sup>Interactive Research and Development Global, Singapore. <sup>2</sup>Clinical Research Dept, Faculty of Infectious and Tropical Diseases, London School of Hygiene & Tropical Medicine, London, UK. <sup>3</sup>Partners In Health, Boston, MA, USA. <sup>4</sup>Dept of Global Health and Social Medicine, Harvard Medical School, Boston, MA, USA. <sup>5</sup>Medical Dept, Médecins Sans Frontières, Paris, France. <sup>6</sup>Division of Global Health Equity, Brigham and Women's Hospital, Boston, MA, USA. <sup>7</sup>Field Epidemiology Dept, Epicentre, Paris, France. <sup>8</sup>Interactive Research and Development, Karachi, Pakistan. <sup>9</sup>Interactive Research and Development, Durban, South Africa. <sup>10</sup>Interactive Research and Development, Dhaka, Bangladesh. <sup>11</sup>Friends for International TB Relief, Ho Chi Minh City, Vietnam. <sup>12</sup>Socios En Salud Sucursal Peru, Lima, Peru. <sup>13</sup>Partners In Health, Ethiopia, Addis Ababa, Ethiopia. <sup>14</sup>Partners In Health, Almaty, Kazakhstan. <sup>15</sup>Partners In Health, Lesotho, Maseru, Lesotho. <sup>16</sup>Zanmi Lasante, Port-au-Prince, Haiti. <sup>17</sup>Haitian Group for the Study of Kaposi's Sarcoma and Opportunistic Infections (GHESKIO), Port-au-Prince, Haiti. <sup>18</sup>Médecins Sans Frontières, Georgia. <sup>19</sup>Médecins Sans Frontières, Armenia. <sup>20</sup>Médecins Sans Frontières, Kyrgyzstan. <sup>21</sup>Médecins Sans Frontières, Belarus. <sup>22</sup>Médecins Sans Frontières, Amsterdam, The Netherlands. <sup>23</sup>These authors contributed equally. <sup>24</sup>These authors contributed equally.

Corresponding author: Palwasha Y. Khan ([palwasha.khan@lshtm.ac.uk](mailto:palwasha.khan@lshtm.ac.uk))

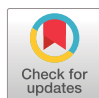

Shareable abstract (@ERSpublications)

**Injectable agents do not offer greater effectiveness than all-oral regimens in individuals with MDR-TB receiving a bedaquiline and/or delamanid-containing regimen. Better evidence on how to effectively manage MDR-TB in people living with HIV is required.** <https://bit.ly/3zds5d0>

**Cite this article as:** Khan PY, Franke MF, Hewison C, *et al.* All-oral longer regimens are effective for the management of multidrug-resistant tuberculosis in high-burden settings. *Eur Respir J* 2022; 59: 2004345 [DOI: 10.1183/13993003.04345-2020].

This single-page version can be shared freely online.

Copyright ©The authors 2022.  
For reproduction rights and  
permissions contact  
[permissions@ersnet.org](mailto:permissions@ersnet.org)

This article has supplementary  
material available from  
[erj.ersjournals.com](http://erj.ersjournals.com)

Received: 16 Dec 2020  
Accepted: 31 May 2021

## Abstract

**Background** Recent World Health Organization guidance on drug-resistant tuberculosis treatment de-prioritised injectable agents, in use for decades, and endorsed all-oral longer regimens. However, questions remain about the role of the injectable agent, particularly in the context of regimens using new and repurposed drugs. We compared the effectiveness of an injectable-containing regimen to that of an all-oral regimen among patients with drug-resistant tuberculosis who received bedaquiline and/or delamanid as part of their multidrug regimen.

**Methods** Patients with a positive baseline culture were included. 6-month culture conversion was defined as two consecutive negative cultures collected >15 days apart. We derived predicted probabilities of culture conversion and relative risk using marginal standardisation methods.

**Results** Culture conversion was observed in 83.8% (526 out of 628) of patients receiving an all-oral regimen and 85.5% (425 out of 497) of those receiving an injectable-containing regimen. The adjusted relative risk comparing injectable-containing regimens to all-oral regimens was 0.96 (95% CI 0.88–1.04). We found very weak evidence of effect modification by HIV status: among patients living with HIV, there was a small increase in the frequency of conversion among those receiving an injectable-containing regimen, relative to an all-oral regimen, which was not apparent in HIV-negative patients.

**Conclusions** Among individuals receiving bedaquiline and/or delamanid as part of a multidrug regimen for drug-resistant tuberculosis, there was no significant difference between those who received an injectable and those who did not regarding culture conversion within 6 months. The potential contribution of

injectable agents in the treatment of drug-resistant tuberculosis among those who were HIV positive requires further study.
